# Supplementary material for: Long‐fragment targeted capture for long‐read sequencing of plastomes
Source: PubMed Central journal article supplement — Appl Plant Sci. 2019 May 8;7(5):e1243. doi: 10.1002/aps3.1243 (PMC6526642; doi:10.1002/aps3.1243), 2019-05-08

**APPENDIX S5.** Mummer visualization of assembled long reads for *Cenchrus americanus*. The *x*-axis shows the reference length; the *y*-axis shows the contig length; horizontal dashed lines represent separation between contigs; shaded gray areas represent inverted repeats; upward purple lines represent contigs in same direction as the reference; downward blue lines represent reverse contigs. In this case, there are two contigs: one starting at the second inverted repeat and finishing at the end of the second repeat, and another covering only the short single copy region.

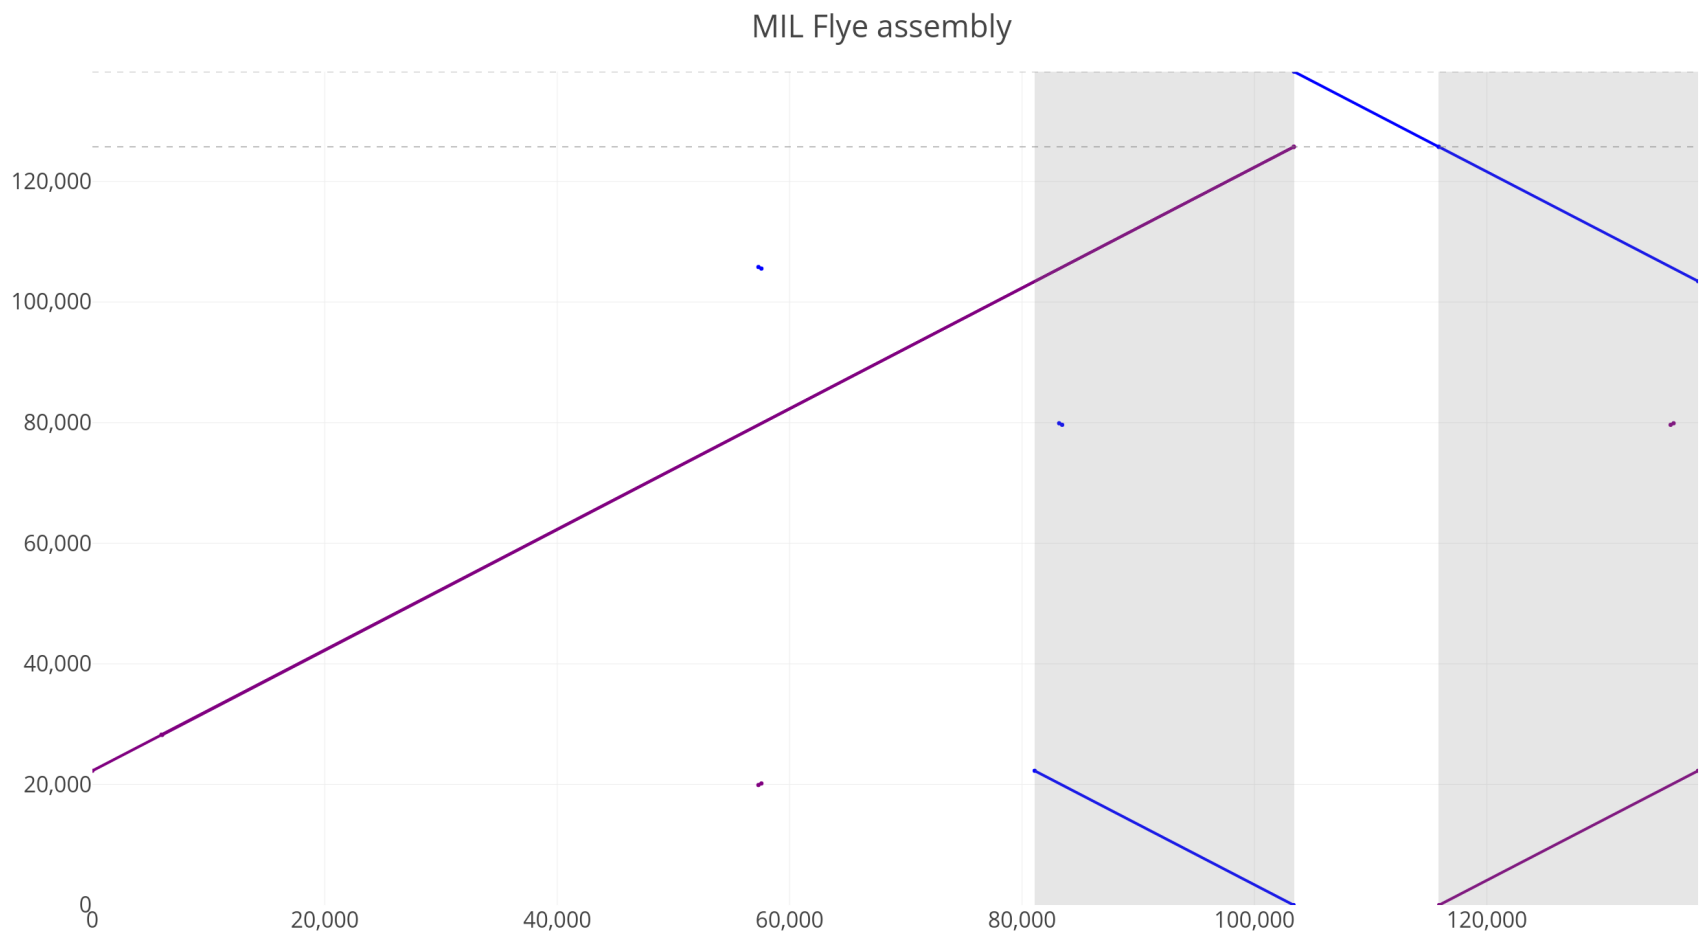

Supplement: APS3-7-e1243-s005.pdf [file APS3-7-e1243-s005.pdf]
