# Supplementary material for: Long‐fragment targeted capture for long‐read sequencing of plastomes
Source: PubMed Central journal article supplement — Appl Plant Sci. 2019 May 8;7(5):e1243. doi: 10.1002/aps3.1243 (PMC6526642; doi:10.1002/aps3.1243), 2019-05-08

**APPENDIX S6.** Mummer visualization of assembled long reads for *Phytelephas aequatorialis*. The  $x$ -axis shows the reference length; the  $y$ -axis shows the contig length; horizontal dashed lines represent separation between contigs; shaded gray areas represent inverted repeats; upward purple lines represent contigs in same direction as the reference; downward blue lines represent reverse contigs. In this case, there numerous contigs (multiple horizontal dashed lines).

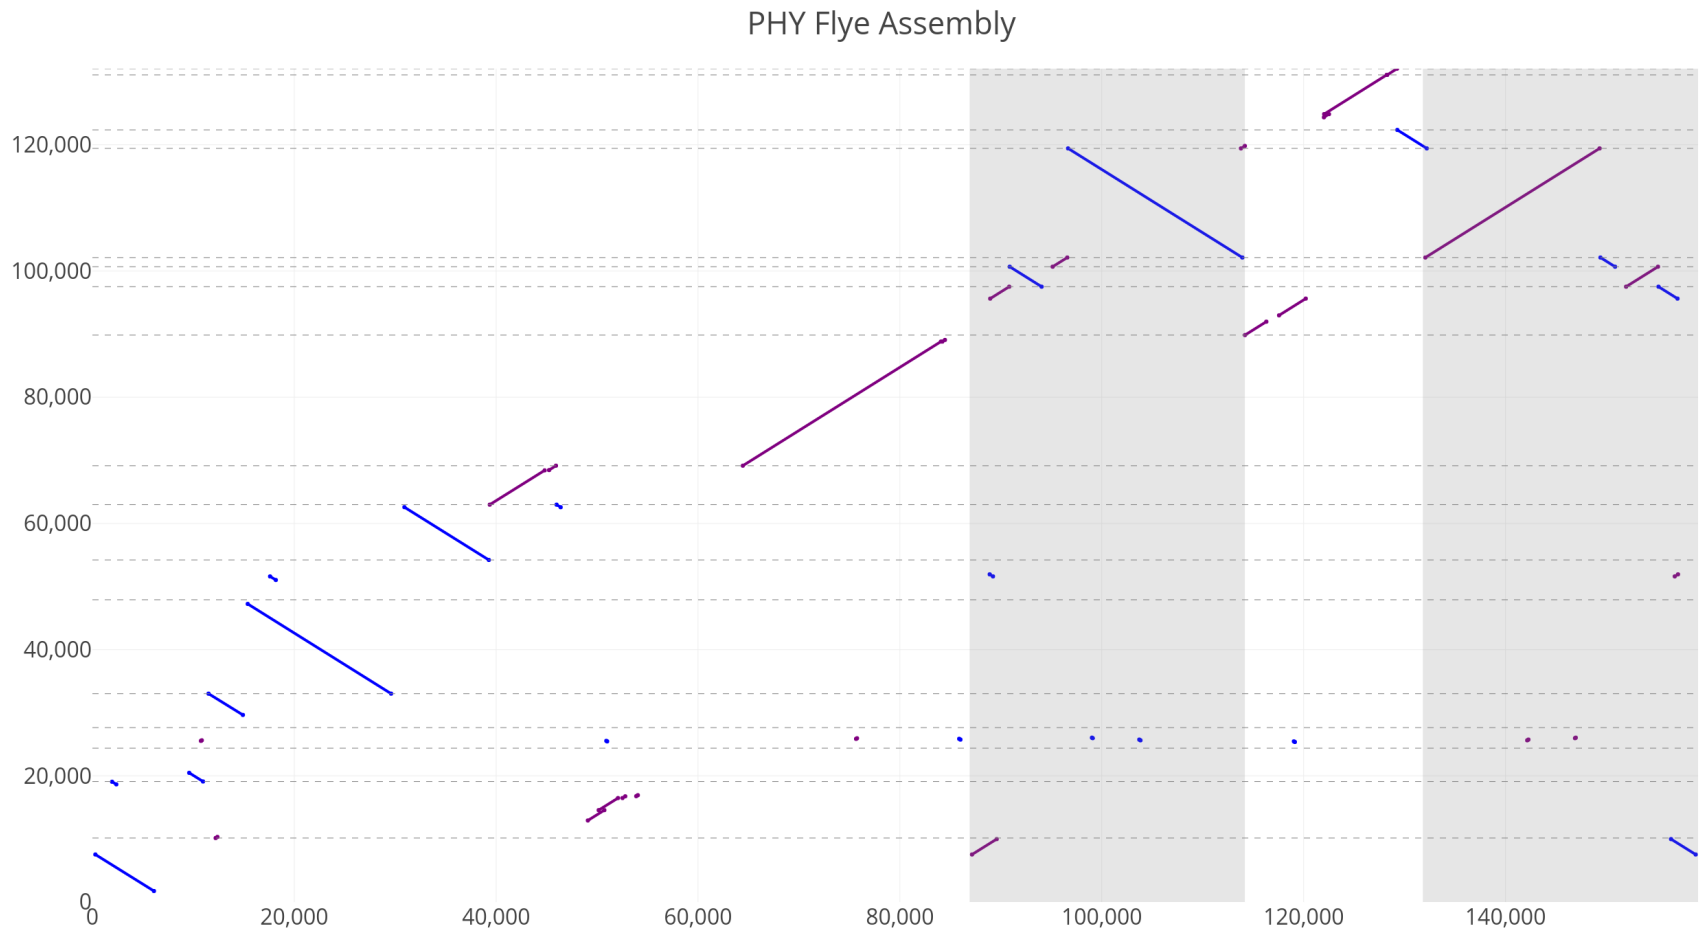

Supplement: APS3-7-e1243-s006.pdf [file APS3-7-e1243-s006.pdf]
