# Supplementary material for: Long‐fragment targeted capture for long‐read sequencing of plastomes
Source: PubMed Central journal article supplement — Appl Plant Sci. 2019 May 8;7(5):e1243. doi: 10.1002/aps3.1243 (PMC6526642; doi:10.1002/aps3.1243), 2019-05-08

**APPENDIX S7.** Mapping of *Phytelephas aequatorialis*-like simulated reads (using LAST software [<http://last.cbrc.jp/>]) to the reference plastome NC\_029957.1.

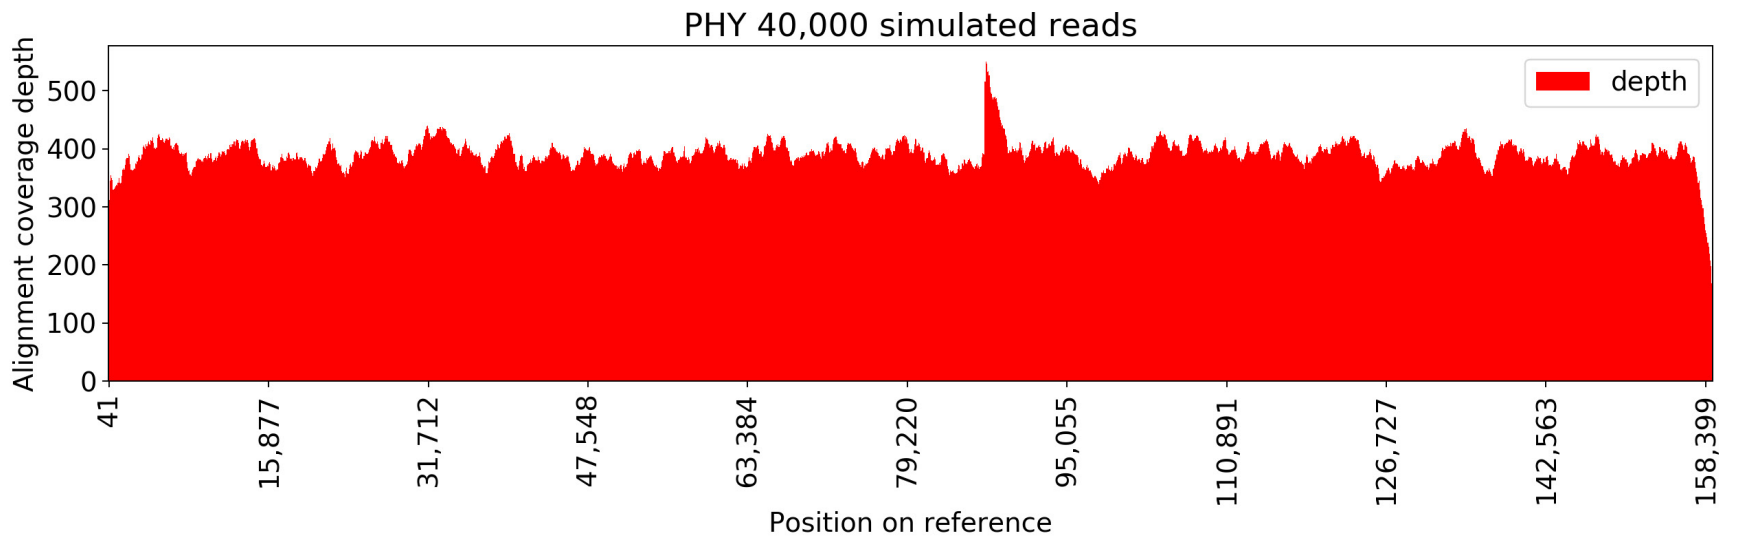

Supplement: APS3-7-e1243-s007.pdf [file APS3-7-e1243-s007.pdf]
